# Supplementary material for: Relation between oxygen stoichiometry and thermodynamic properties and the electronic structure of nonstoichiometric perovskite La0.6Sr0.4CoO3−δ
Source: Royal Society of Chemistry journal article supplement (doi:10.1039/c6cp05435h), 2016-01-01

# Supporting Information

Figure S1: X-Ray diffraction data of LSC64 (T=25°C).

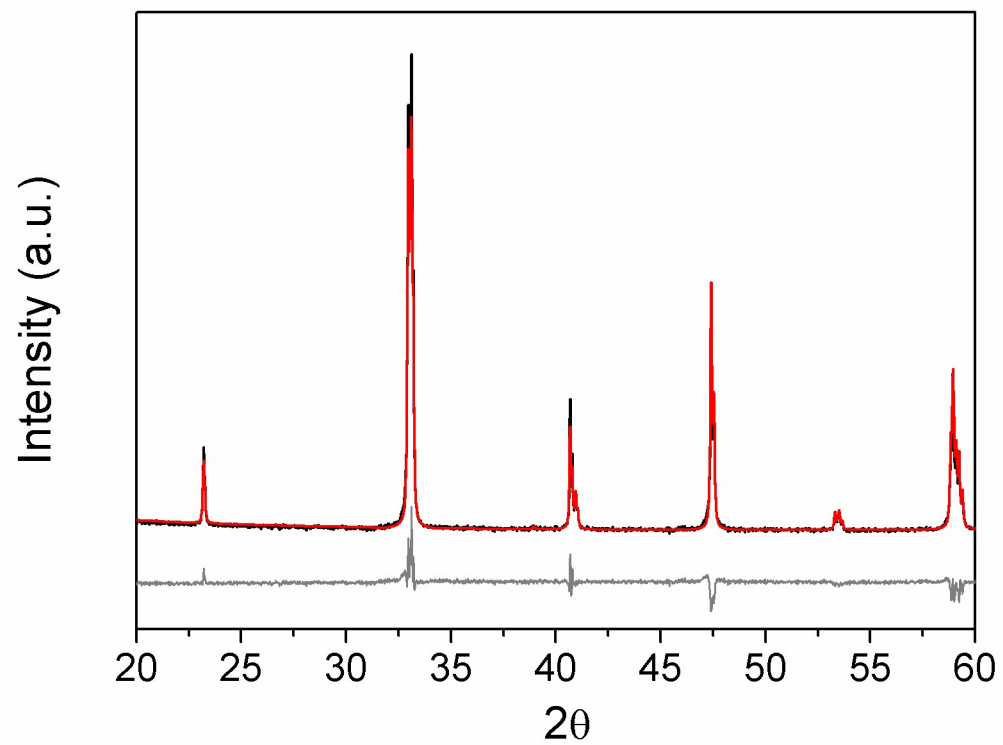

Figure S2: In situ high-temperature X-Ray diffraction data of LSC64 ( $pO_2=0.209$  atm): (a) general view and (b) zoom.

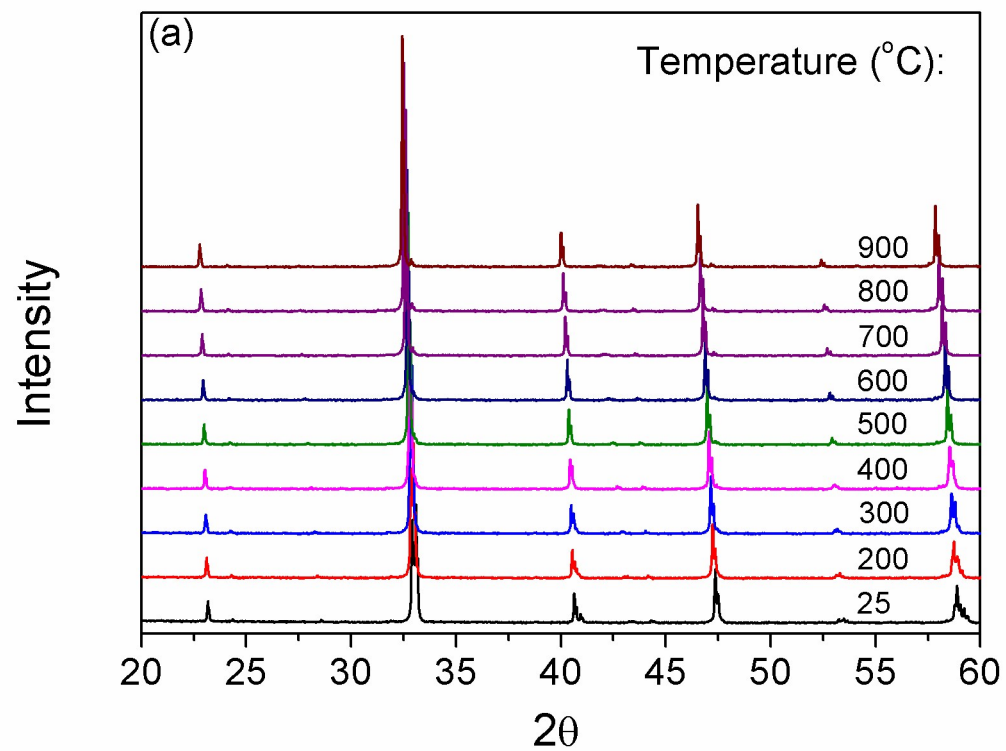

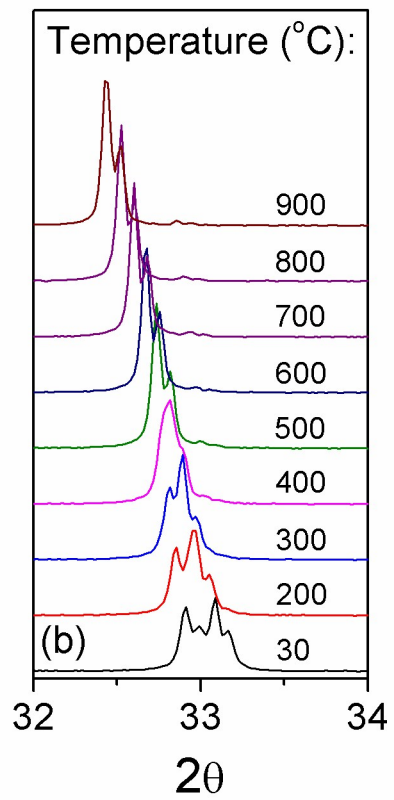

Supplement: c6cp05435h1.pdf [file c6cp05435h1.pdf]
